# Supplementary material for: Discovery of Nuclear-Encoded Genes for the Neurotoxin Saxitoxin in Dinoflagellates
Source: PubMed Central journal article supplement (PMC3097229; doi:10.1371/journal.pone.0020096), 2011-05-18

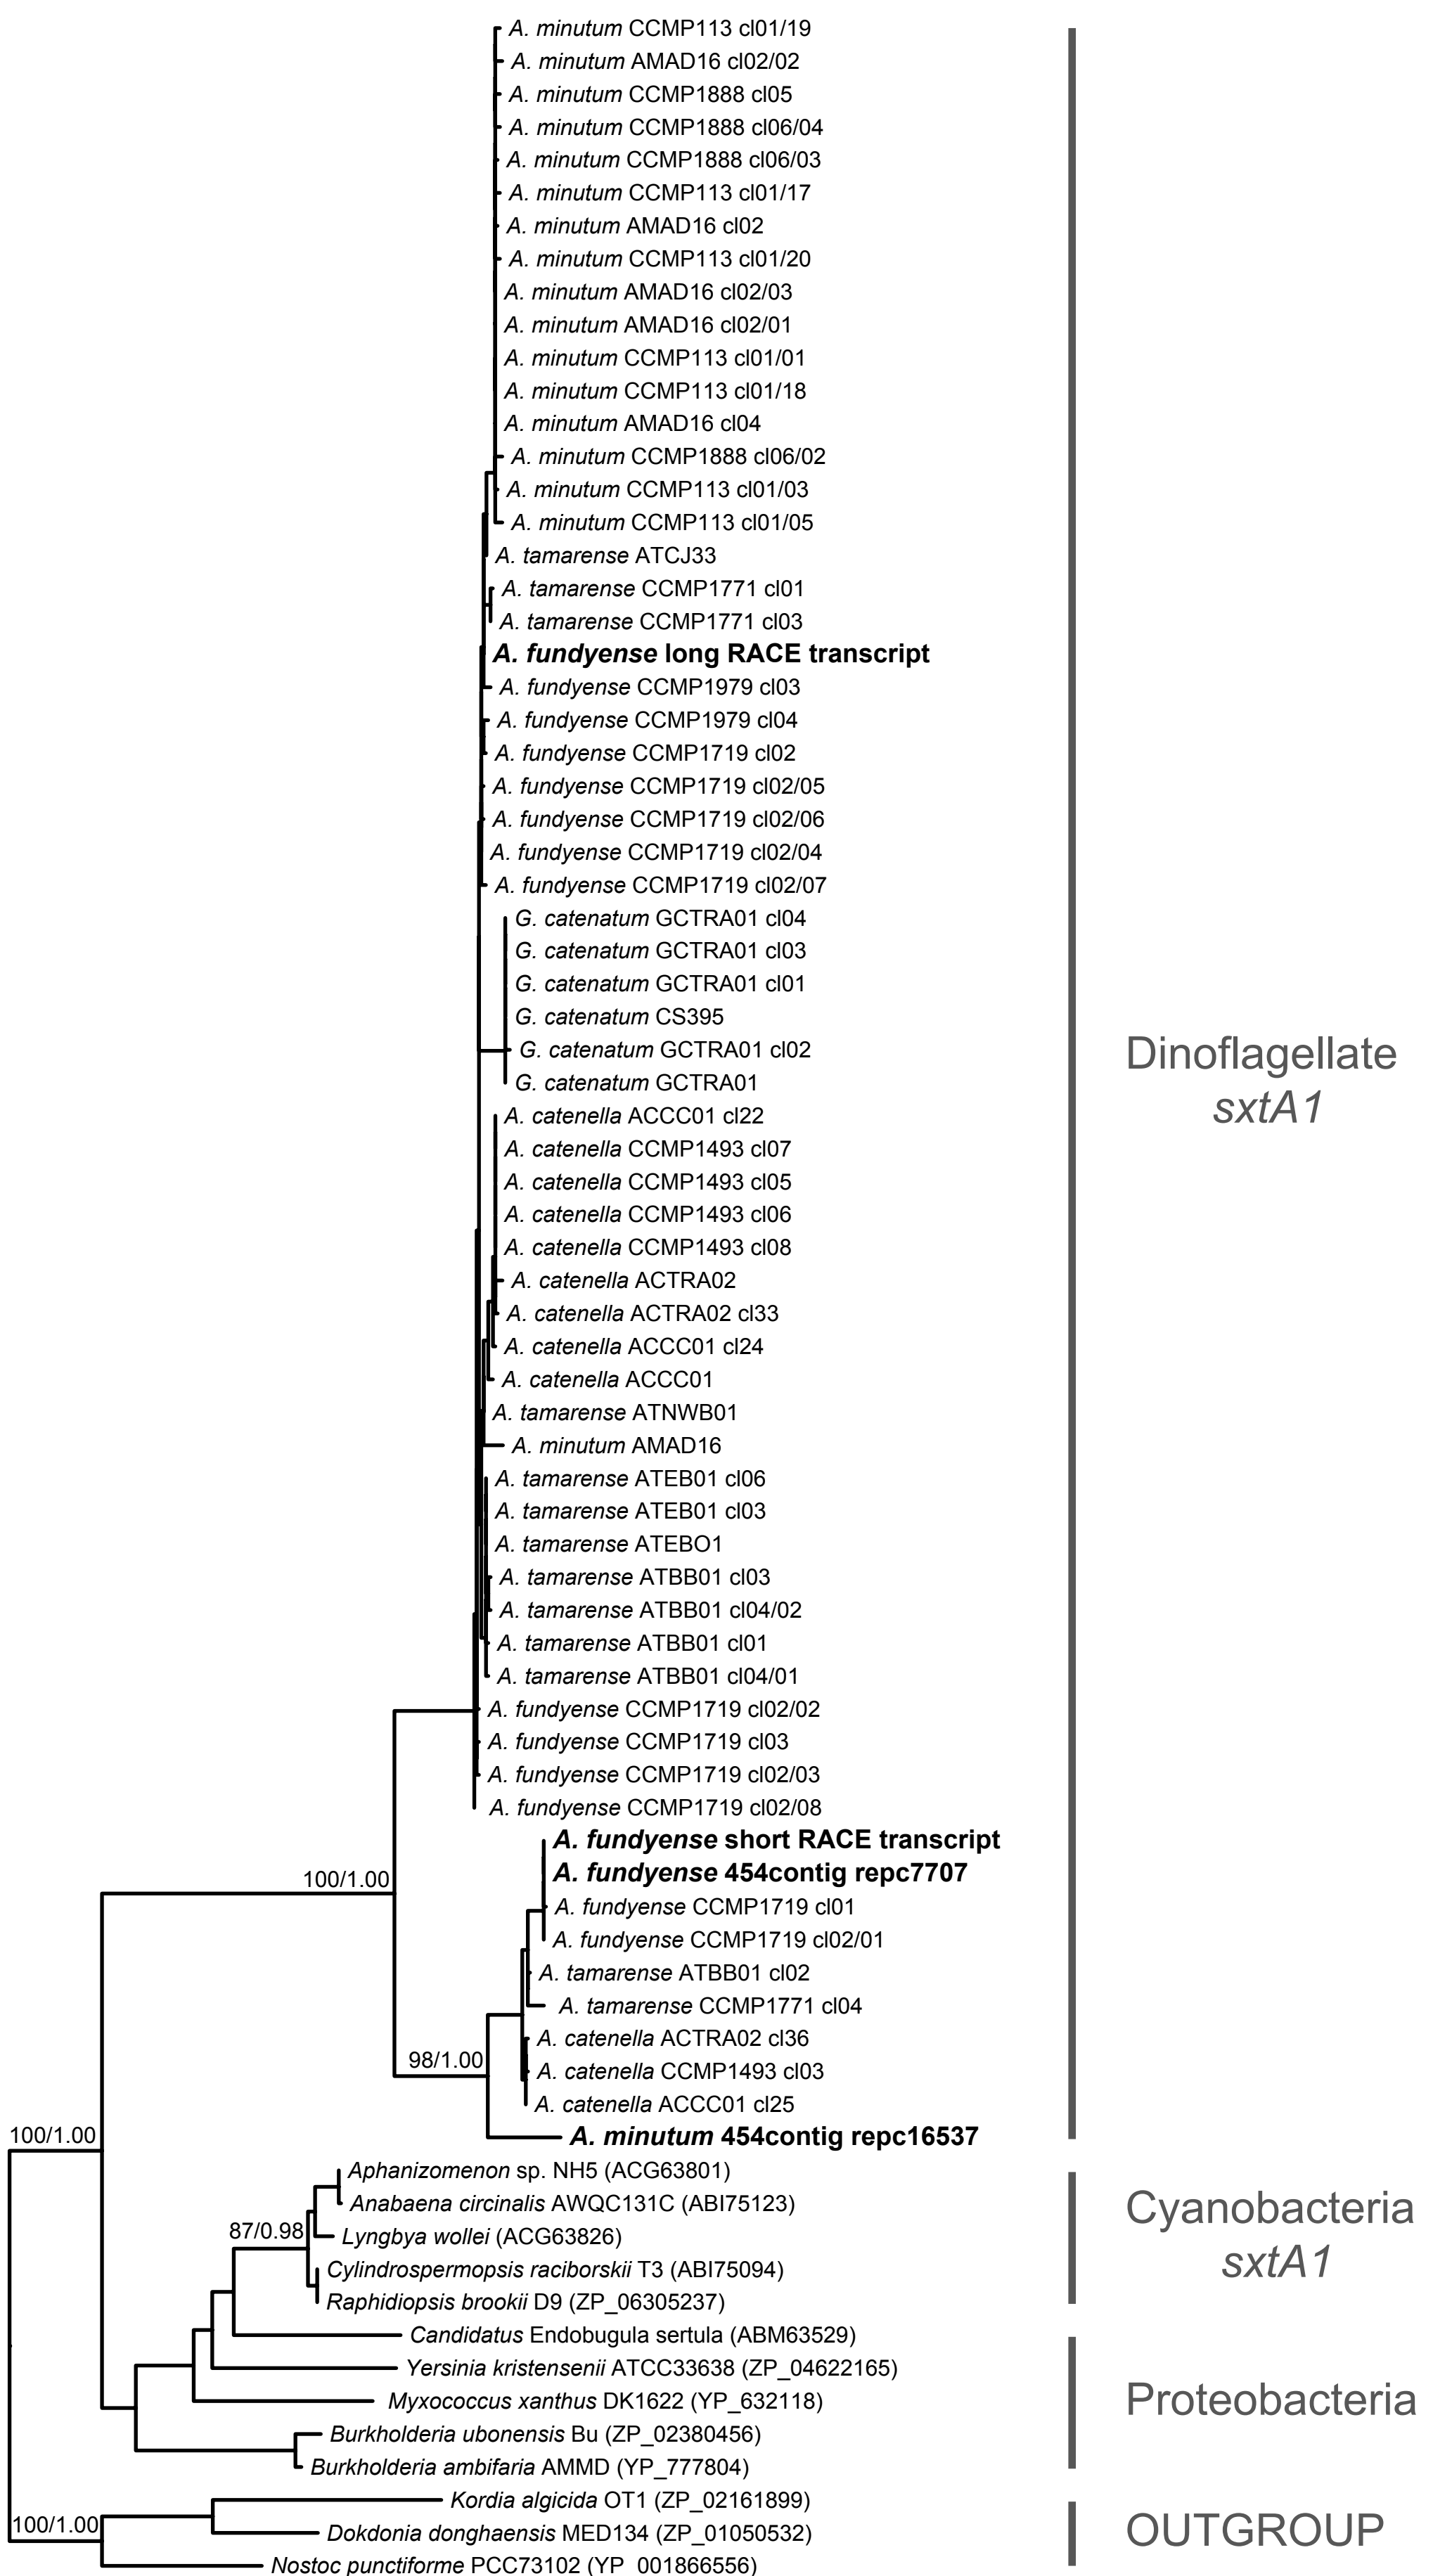

Supplement: pone.0020096.s001.pdf [file pone.0020096.s001.pdf]
